# Supplementary material
Source: PubMed Central journal article supplement (PMC1347964)
Supplement: pnas_0502470102_1.pdf [file pnas_0502470102_1.pdf]

TABLE 1 List of sequences of primers and probes used

|                      |                |                                           | Product size (bp) | Annealing temperature (°C) |
|----------------------|----------------|-------------------------------------------|-------------------|----------------------------|
| mouse IA-2           | forward primer | 5'- tgc gct cag tgc tgc tta ctc ta -3'    | 114               | 60                         |
|                      | reverse primer | 5'- agg cgc tcc tta tcc cgc tgt ct -3'    |                   |                            |
|                      | probe          | 5'- gtg gct ttg gca gtg gcc ttg tgt a -3' |                   |                            |
| mouse IA-2b          | forward primer | 5'- ctg gct tcc agc ctt gcc ta -3'        | 120               | 60                         |
|                      | reverse primer | 5'- ggc ata gct cct ggt agg ct -3'        |                   |                            |
|                      | probe          | 5'- ttg tct gga cta ggc gct gac ccc a -3' |                   |                            |
| mouse Insulin        | forward primer | 5'- cgt gaa gtg gag gac cca caa -3'       | 158               | 60                         |
|                      | reverse primer | 5'- gtt gca gta gtt ctc cag ctg -3'       |                   |                            |
|                      | probe          | 5'- tgg cat tgt gga tca gtg ctg cac c -3' |                   |                            |
| mouse $\beta$ -actin | forward primer | 5'- tgt tac caa ctg gga oga cat gg -3'    | 763               | 60                         |
|                      | reverse primer | 5'- gat ctt gat ctt cat ggt gct agg -3'   |                   |                            |
|                      | probe          | 5'- acc cac act gtg ccc atc tac ga -3'    |                   |                            |

All probes are conjugated FAM at 5' region.
